# Supplementary material for: Implementation of a mailed faecal immunochemical test programme for colorectal cancer screening among Veterans
Source: PubMed Central journal article supplement — BMJ Open Qual. 2022 Nov 16;11(4):e001927. doi: 10.1136/bmjoq-2022-001927 (PMC9670919; doi:10.1136/bmjoq-2022-001927), 2022-11-16
Supplement: bmjoq-2022-001927supp001.pdf [file bmjoq-2022-001927supp001.pdf]

## Supplemental Figure. Primer Postcard Example Front and Back

**Dear Veteran,** You are due for colon cancer screening. Colon cancer rarely causes symptoms early and this screening could save your life. We encourage you to complete a simple at home screening test.



You will be mailed a screening kit (FIT test) within the next 2 weeks. Please complete and return the kit as soon as you can!

-  **Screening takes minutes at home.**  
Your kit can detect signs of colon cancer. Simply follow the directions included in the kit.
-  **Get results fast.**  
Your primary care provider will have your results within 2 weeks after you mail back your sample.
-  **Testing is free.**  
Mail back your sample in the pre-paid envelope. Return postage is included.
-  **What happens next?**  
If the test is positive, we will contact you to recommend a colonoscopy. If the kit is negative, we recommend repeat screening next year.

If you have obtained your colon cancer screening test outside of VA, or if you believe that you are not due for screening, please contact us so that we can update your records.

If you have any questions about colon cancer screening, please contact your care team.

Yours truly,  
Primary Care Team  
(1-800-329-8387)
